# Supplementary material for: Dispatch of Firefighters and Police Officers in Out‐of‐Hospital Cardiac Arrest: A Nationwide Prospective Cohort Trial Using Propensity Score Analysis
Source: PubMed Central journal article supplement — J Am Heart Assoc. 2017 Oct 4;6(10):e005873. doi: 10.1161/JAHA.117.005873 (PMC5721830; doi:10.1161/jaha.117.005873), 2017-10-04

# **Supplemental Material**

**Table S1.** Dispatch codes for cardiac arrest used at the Emergency Medical Coordination Center.

Unconscious Adult – Unresponsive and not breathing normally  
Unconscious Adult – Ongoing cardiopulmonary resuscitation  
Unconscious Adult - Case of serious illness  
Unconscious Adult – Unresponsive and no breathing  
Unconscious Adult – Ongoing Telephone-CPR  
Unconscious Adult -Unresponsive  
Unconscious child – Unresponsive and not breathing normally  
Unconscious child – Ongoing cardiopulmonary resuscitation  
Unconscious child – Case of serious illness  
Unconscious child – Unresponsive and no breathing  
Unconscious child - Unresponsive  
Unconscious child - Ongoing Telephone-CPR  
Seizure – Unresponsive  
Difficulty in breathing – Unresponsive  
Diabetes – Unresponsive  
Drowning – Unresponsive and not breathing normally  
Suspected suicide – Unresponsive and not breathing normally

**Table S2.** Baseline characteristics of patients not included in control or intervention group.

|                                            |                | Intervention<br>n=3543 | Control<br>n=5155 | Not included<br>n=2928 |
|--------------------------------------------|----------------|------------------------|-------------------|------------------------|
|                                            |                | N (%)                  | N (%)             | N (%)                  |
| <b>YEAR</b>                                | 2012           | 961 (27.1%)            | 1541 (29.9%)      | 1227 (35.4%)           |
|                                            | 2013           | 1204 (34.0%)           | 1739 (33.7%)      | 1155 (33.3%)           |
|                                            | 2014           | 1378 (38.9%)           | 1875 (36.4%)      | 1086 (31.3%)           |
| <b>Time of day</b>                         | Day 07-18      | 2190 (65.9%)           | 3318 (64.4%)      | 2265 (66.1%)           |
| <b>Sex</b>                                 | Female         | 1132 (32.0%)           | 1639 (31.8%)      | 1165 (33.6%)           |
| <b>Location</b>                            | Outside home   | 1040 (29.4%)           | 1431 (27.8%)      | 1051 (30.3%)           |
| <b>Witnessed</b>                           | Yes            | 2001 (58.3%)           | 3062 (60.5%)      | 2137 (64.4%)           |
| <b>BY-CPR</b>                              | Yes            | 2039 (58.2%)           | 2870 (56.0%)      | 1905 (55.5%)           |
| <b>Rhythm</b>                              | VF/VT          | 761 (22.0%)            | 1091 (22.2%)      | 743 (22.0%)            |
| <b>INDEXED as</b>                          | Cardiac arrest | 2701 (76.2%)           | 3623 (70.3%)      | 2122 (61.2%)           |
| <b>Etiology</b>                            | Medical        | 3027 (88.8%)           | 4476 (89.1%)      | 2027 (62.2%)           |
| <b>Publ deff</b>                           | Yes            | 65 (1.8%)              | 94 (1.8%)         | 71 (2.0%)              |
| <b>AGE (median, q1, q3)</b>                |                | 71 (60-81)             | 71 (60-80)        | 71 (60-81)             |
| <b>AGE (mean, sd)</b>                      |                | (68.6) (16.5)          | 68.0 (16.7)       | 68.6 (16.3)            |
| <b>Call - arrival EMS (median, q1, q3)</b> |                | 12 (8-17)              | 12 (8-18)         | 11.0 (8-17))           |
| <b>Call - arrival EMS (mean, sd)</b>       |                | 14.1 (9.0)             | 14.4 (10.3)       | 13.9 (9.5)             |

BY-CPR:bystander-cardiopulmonary resuscitation;VF/VT:ventricular fibrillation/ventricular tachycardia;INDEXED:indexed as cardiac arrest at dispatch center;Public defib:public access defibrillation;EMS:emergency medical services.

**Table S3.** Outcome variables for patients not included in control or intervention group.

|                                | Intervention<br>n=3543<br>n (%) | Control<br>n=5155<br>n (%) | Not included<br>n=2928<br>n (%) |
|--------------------------------|---------------------------------|----------------------------|---------------------------------|
| <b>First R. First at scene</b> | 1571 (44.3)                     | 950<br>(18.4)              | 289 (8.3%)                      |
| <b>Def. by First R.</b>        | 188 (5.3)                       | 239 (4.6)                  | 62 (1.8%)                       |
| <b>Admitted alive</b>          | 1143 (32.4)                     | 1331<br>(26.2)             | 1054 (30.8%)                    |
| <b>30d survival</b>            | <b>335 (9.6)</b>                | <b>445 (8.8)</b>           | 330 (9.7%)                      |
| <b>Call – dispatch EMS*</b>    | 2 (1-3)                         | 2 (1-2)                    | 2 (1-3)                         |
| <b>Call – dispatch EMS†</b>    | 2.5 (3.1)                       | 2.1 (2.5)                  | 2.9 (4.7)                       |
| <b>Call - arrival FirstR*</b>  | 9 (7-13)                        | 10 (7-15)                  | 11 (8-16)                       |
| <b>Call - arrival FirstR†</b>  | 11.0 (6.1)                      | 12.5 (8.1)                 | 12.9 (7.9)                      |

First R: first responders; Defib. by First R: defibrillation by first responders; Call-arrival First

R: emergency call to arrival of first responders on scene: \*(median, q1, q3): †(mean, sd)

**Figure S1.** Kaplan-Meier survival curve for control and intervention group after propensity score matching.

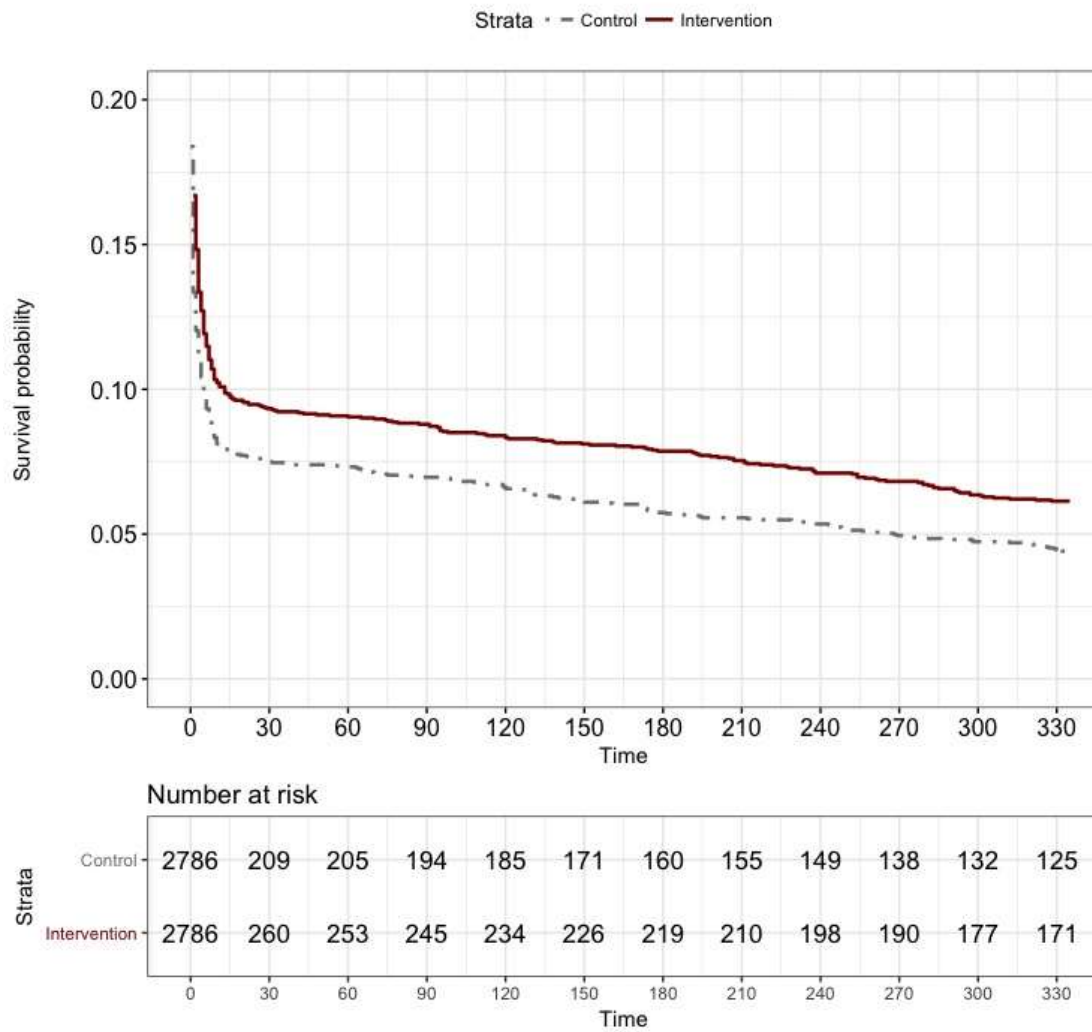

Supplement: JAH3-6-e005873-s001.pdf [file JAH3-6-e005873-s001.pdf]
